# Supplementary material for: Sunlight-activated long persistent luminescence in the ultraviolet-B spectral region from Bi3+-doped garnet phosphors for covert optical tagging
Source: Royal Society of Chemistry journal article supplement (doi:10.1039/d1tc01922h), 2021-01-01
Supplement: d1tc01922h1.pdf [file d1tc01922h1.pdf]

## Supporting Information

**Title:** Sunlight-activated long persistent luminescence in the ultraviolet-B from Bi<sup>3+</sup>-doped garnet phosphors for covert optical tagging

**Author(s):** Jingwei Liu<sup>a</sup>, Yanjie Liang<sup>\*a,b</sup>, Shao Yan<sup>a</sup>, Dongxun Chen<sup>a</sup>, Shihai Miao<sup>a</sup>, Weili Wang<sup>a</sup>, Jianqiang Bi<sup>a</sup>

<sup>a</sup> Key Laboratory for Liquid-Solid Structure Evolution and Processing of Materials, Ministry of Education, Shandong University, Jinan 250061, P. R. China.

<sup>b</sup> Advanced Medical Research Institute, Shandong University, Jinan 250012, P. R. China.

\*Corresponding author: YJ Liang

E-mail: [yanjie.liang@sdu.edu.cn](mailto:yanjie.liang@sdu.edu.cn)

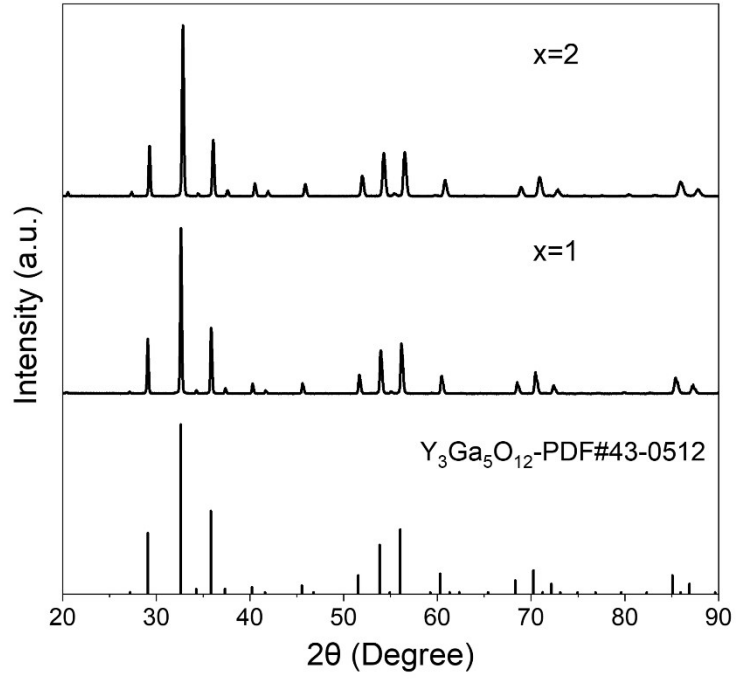

**Fig. S1.** XRD patterns of  $Y_3Ga_{5-x}Al_xO_{12}:0.3\%Bi^{3+}$  ( $x = 1, 2$ ) phosphors. Standard data of cubic  $Y_3Ga_5O_{12}$  phase (JCPDS No. 43-0512) is also displayed as reference.

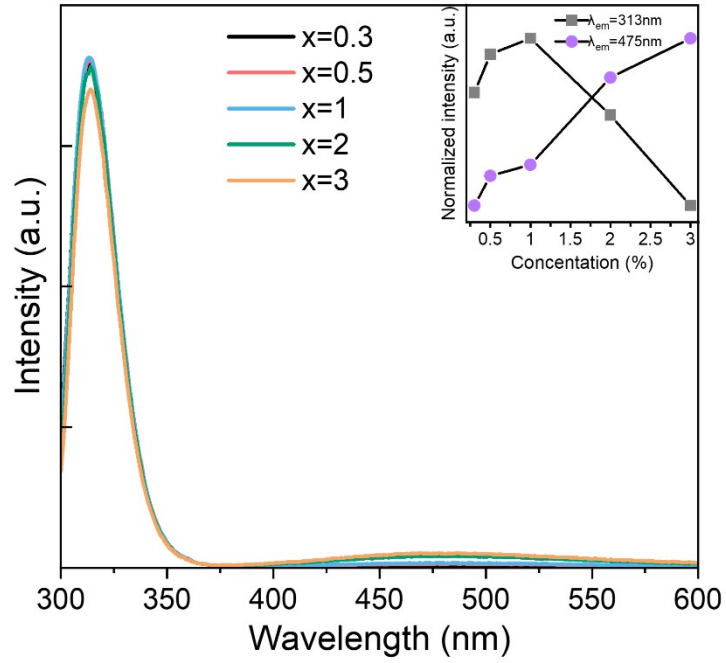

**Fig. S2.** Emission spectra of YGG: $x\%$ Bi ( $x= 0.3, 0.5, 1, 2, 3$ ) phosphors. The emission spectra are acquired under 289 nm light excitation. The inset depicts intensities of 313 nm and 475 nm as a function of Bi doping concentration.

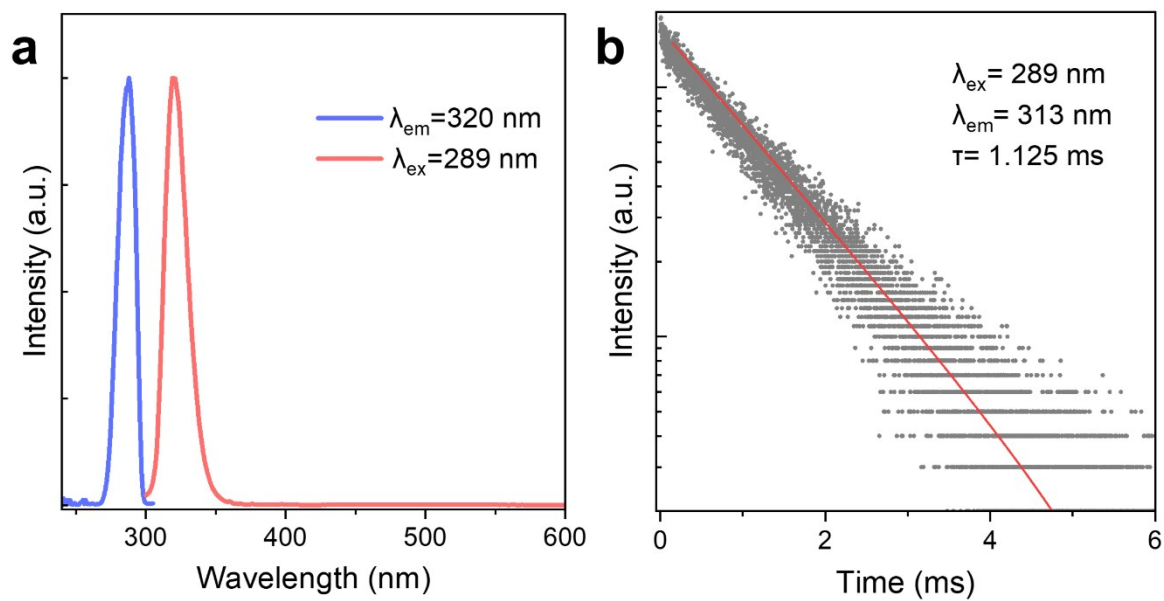

**Fig. S3.** (a) The excitation and emission spectra of YGG:Bi phosphor at 77 K. (b) The decay curve of YGG:Bi phosphor.

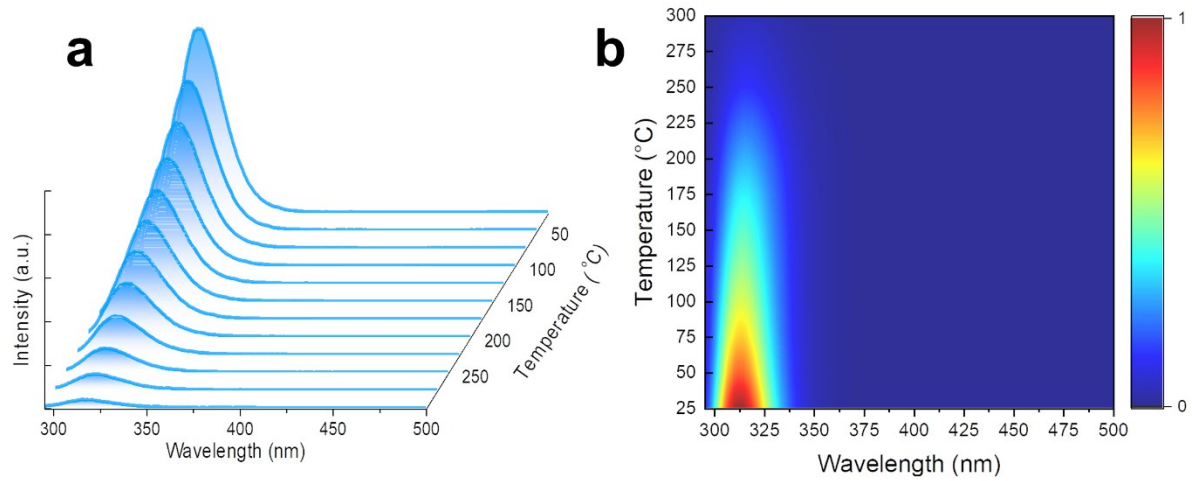

**Fig. S4.** The emission spectra of YGG:Bi phosphor at different temperatures ranging from 25 °C to 300 °C.

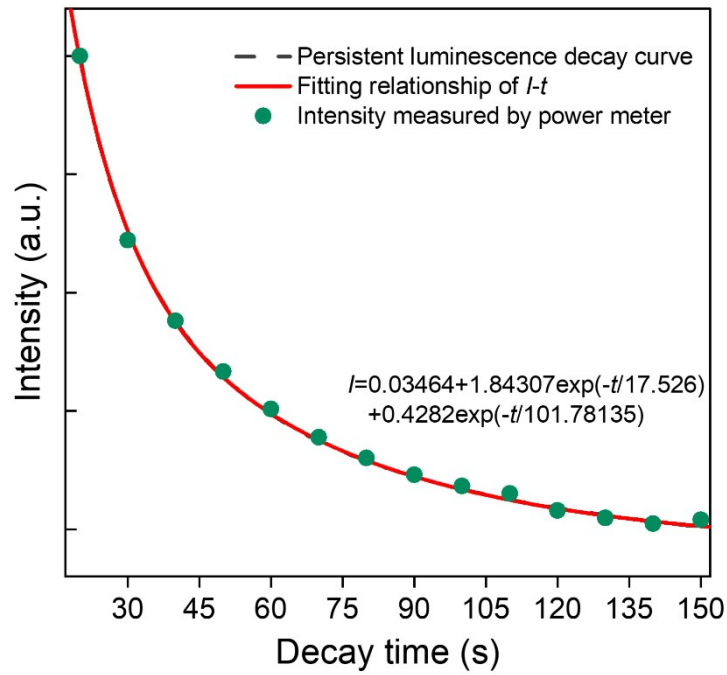

**Fig. S5.** Persistent luminescence decay curve (grey dash curve) monitored at 313 nm. The decay curve is normalized at the 20 s decay instant and the red line curve is the thus obtained fitting relationship between the persistent luminescence intensity ( $I$ ) and the decay time ( $t$ ). The measured persistent luminescence intensities are also normalized at the 20 s decay instant and displayed as green dots in the Fig. 3a.

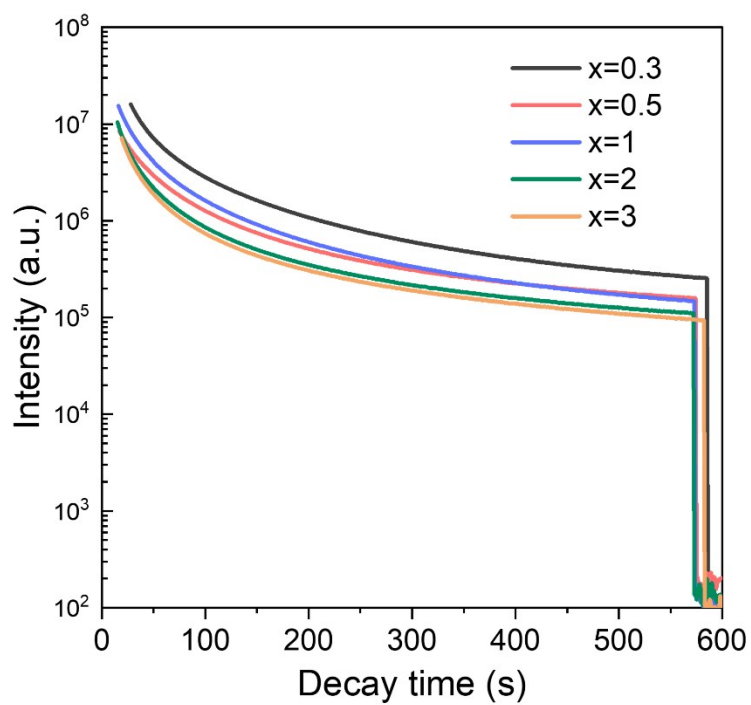

**Fig. S6.** Effect of Bi doping concentration on the persistent luminescence performance of YGG:Bi phosphors. The persistent luminescence decay curves were monitored at 313 nm after irradiation by a 254 nm UV lamp for 10 min.

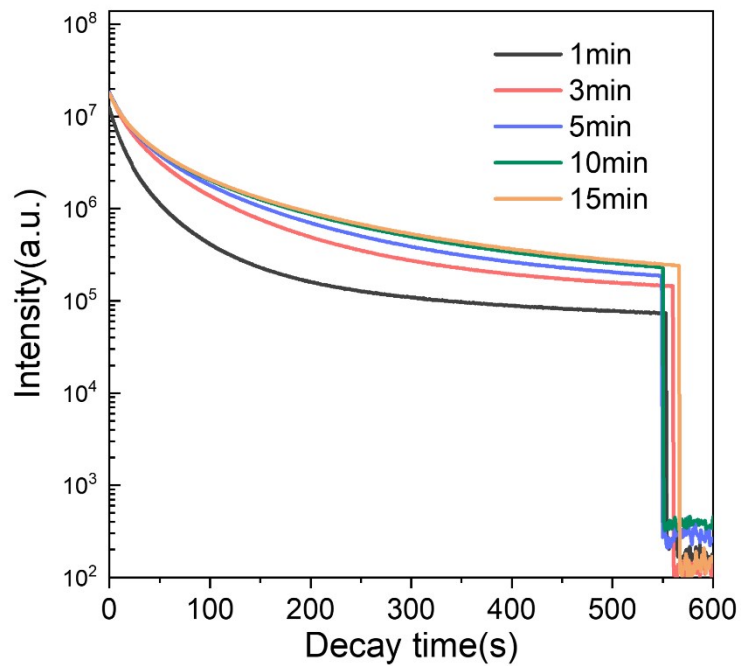

**Fig. S7.** Effect of excitation duration on the charging capability and the persistent luminescence performance of YGG:Bi phosphor. The persistent luminescence decay curves were monitored at 313 nm after irradiation by a 254 nm UV lamp for various time from 1 min to 15 min.



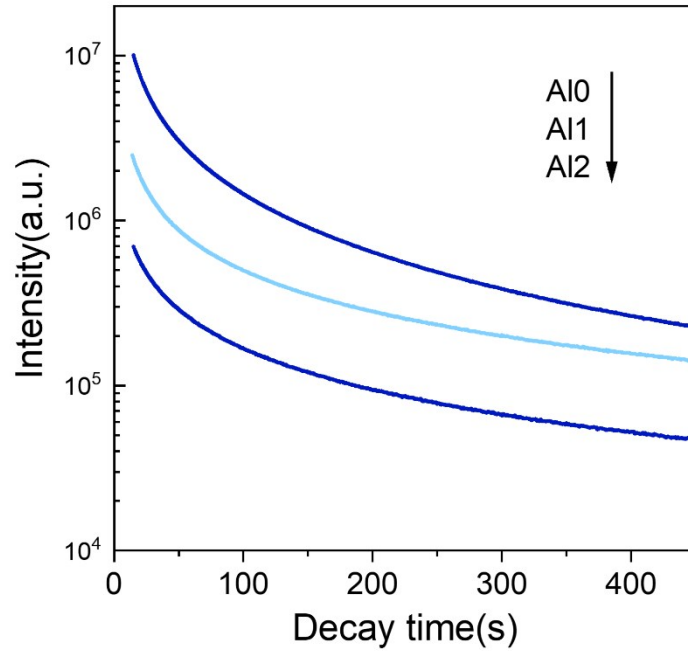

**Fig. S8.** UVB persistent luminescence decay curves of  $Y_3Ga_{5-x}Al_xO_{12}:0.3\%Bi^{3+}$  ( $x = 0, 1, 2$ ) phosphor disks irradiated by a 254 nm UV lamp for 15 min at room temperature.

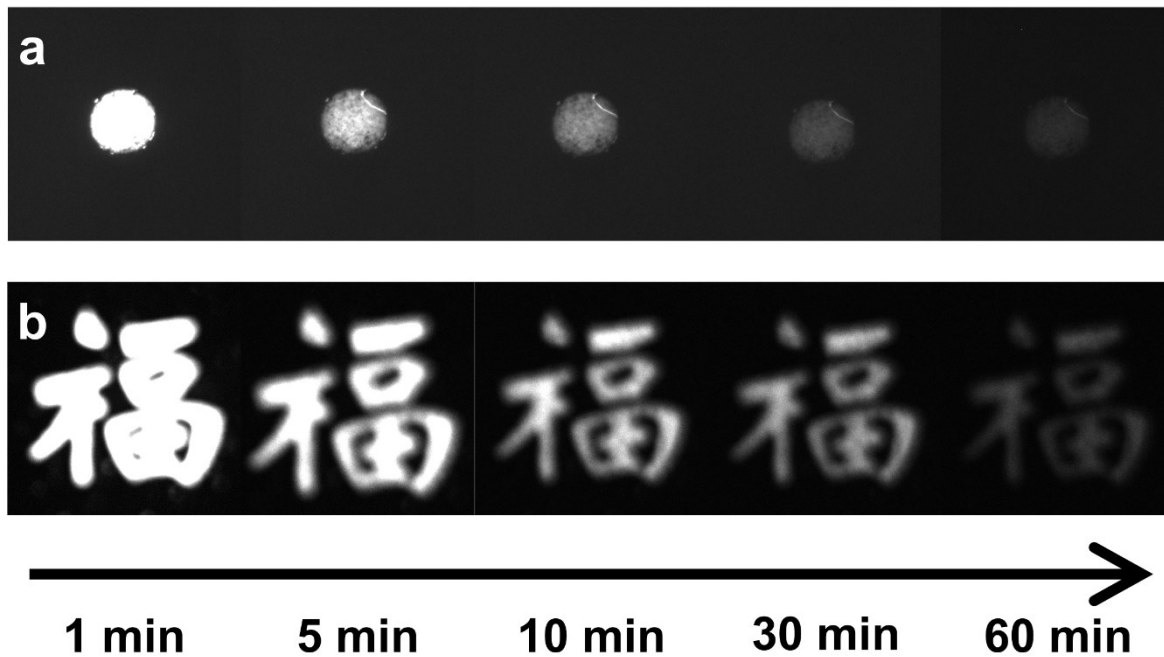

**Fig. S9.** (a) UVB persistent luminescence images of YGG:Bi ceramic disc taken at different decay instants (1-60 min) in an indoor-lighting environment after irradiation by a 254 nm lamp for 15 min. (b) Persistent luminescence images of Chinese character “fu” (“fortune” in English) formed by YGG:Bi phosphor powders on whiteboard in bright indoor environment. The pattern was irradiated by 254 nm UV light for 15 min.

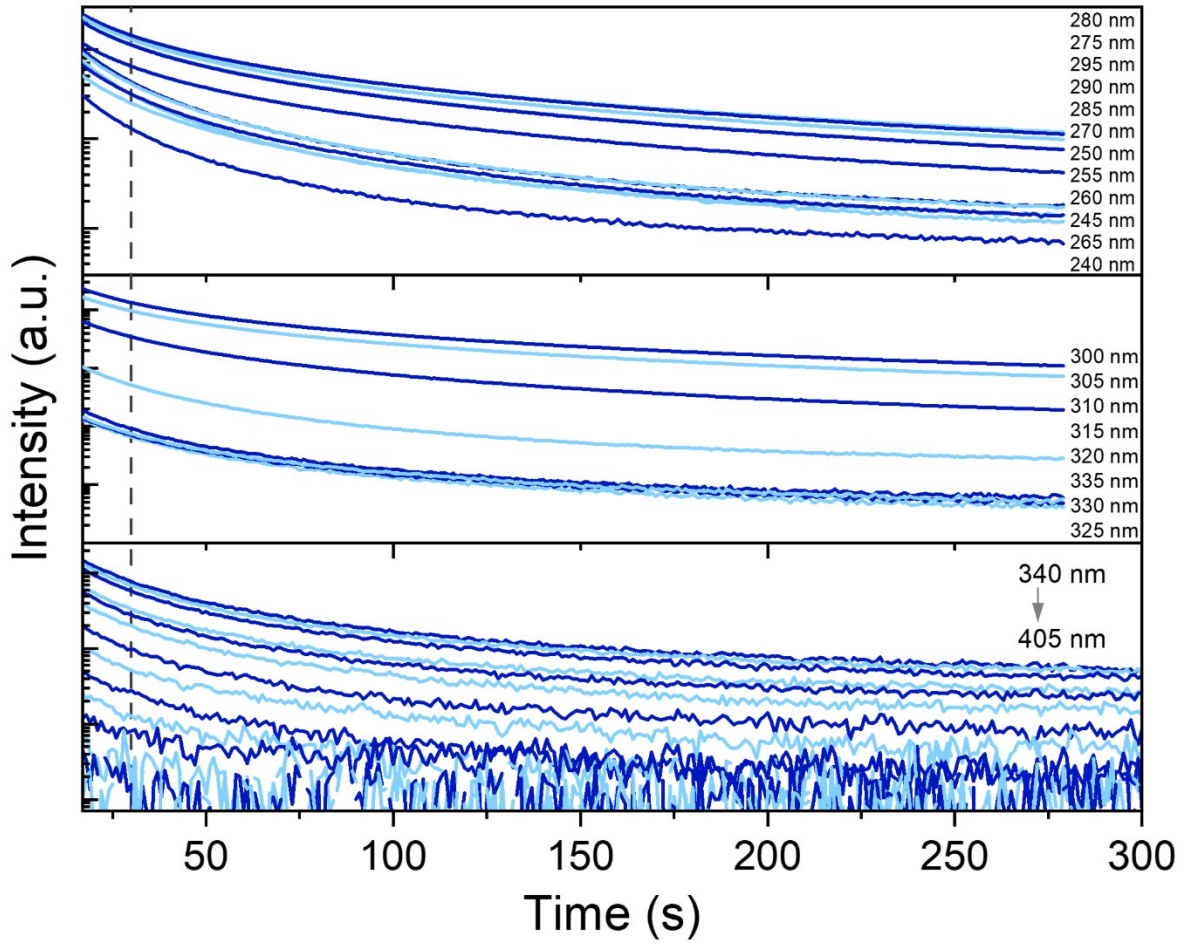

**Fig. S10.** Persistent luminescence decay curves of YGG:Bi phosphor irradiated by 240–405 nm lights for 5 min. The monitoring wavelength is 313 nm. The afterglow intensity at time of 30 s after the stoppage of the irradiation was used to plot the persistent luminescence excitation spectrum shown in Fig. 4a.

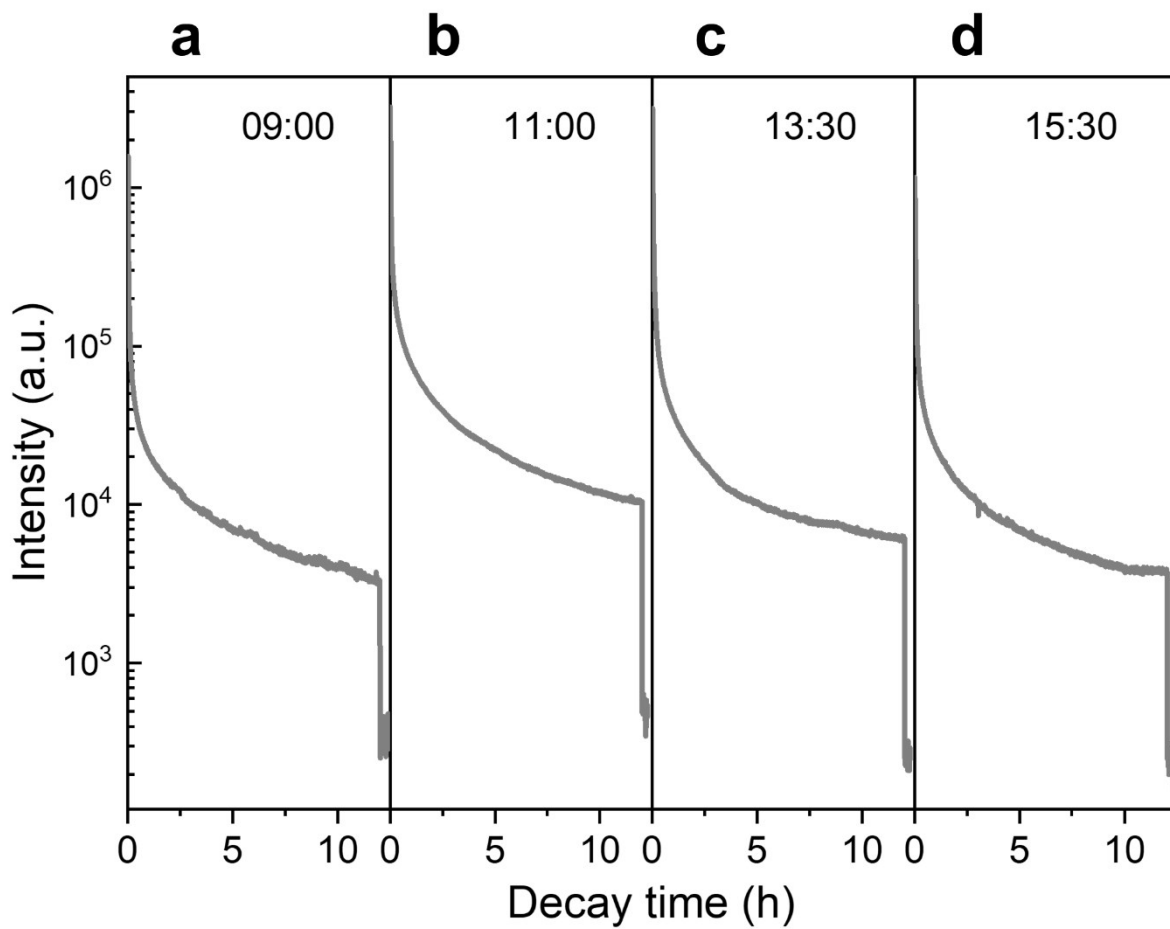

**Fig. S11.** UVB persistent luminescence decay curves of YGG:Bi phosphor disk irradiated by direct sunlight for 30 min at different moments between sunrise and sunset during the day. a, at 9:00. b, at 11:00. c, at 13:30. d, at 15:30.

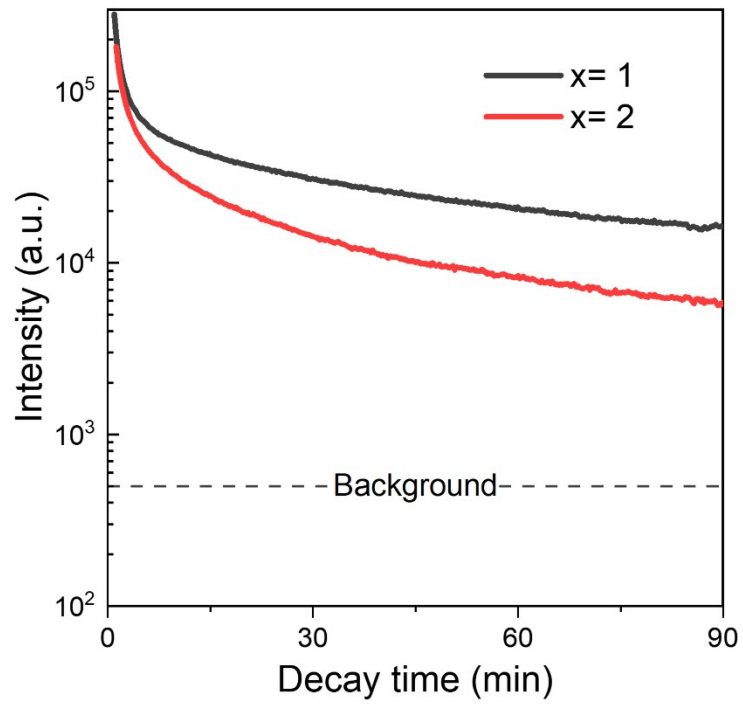

**Fig. S12.** UVB persistent luminescence decay curves of  $\text{Y}_3\text{Ga}_{5-x}\text{Al}_x\text{O}_{12}:\text{0.3\%Bi}^{3+}$  ( $x = 1, 2$ ) phosphor disks after irradiation by direct sunlight for 30 min on a sunny day.

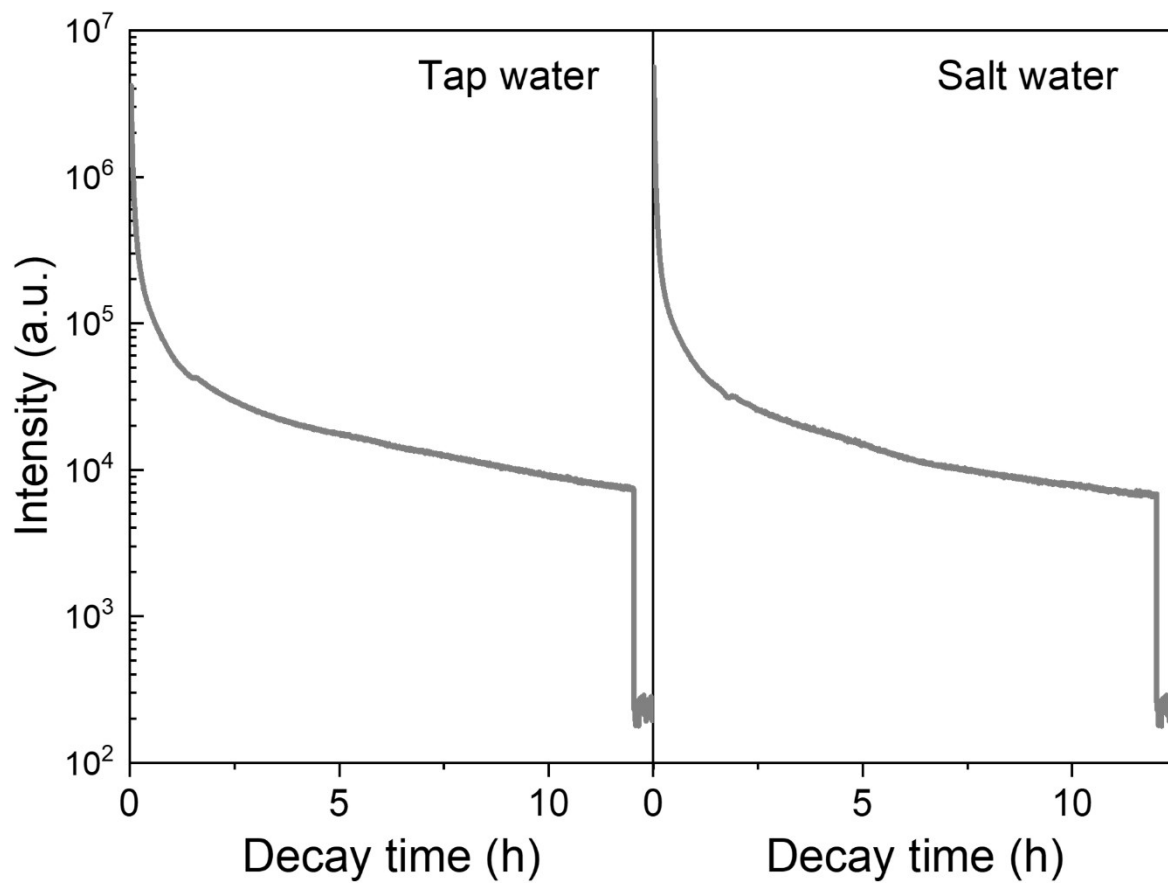

**Fig. S13.** UVB persistent luminescence decay curves of YGG:Bi phosphor disk irradiated by direct sunlight for 30 min in different solutions.

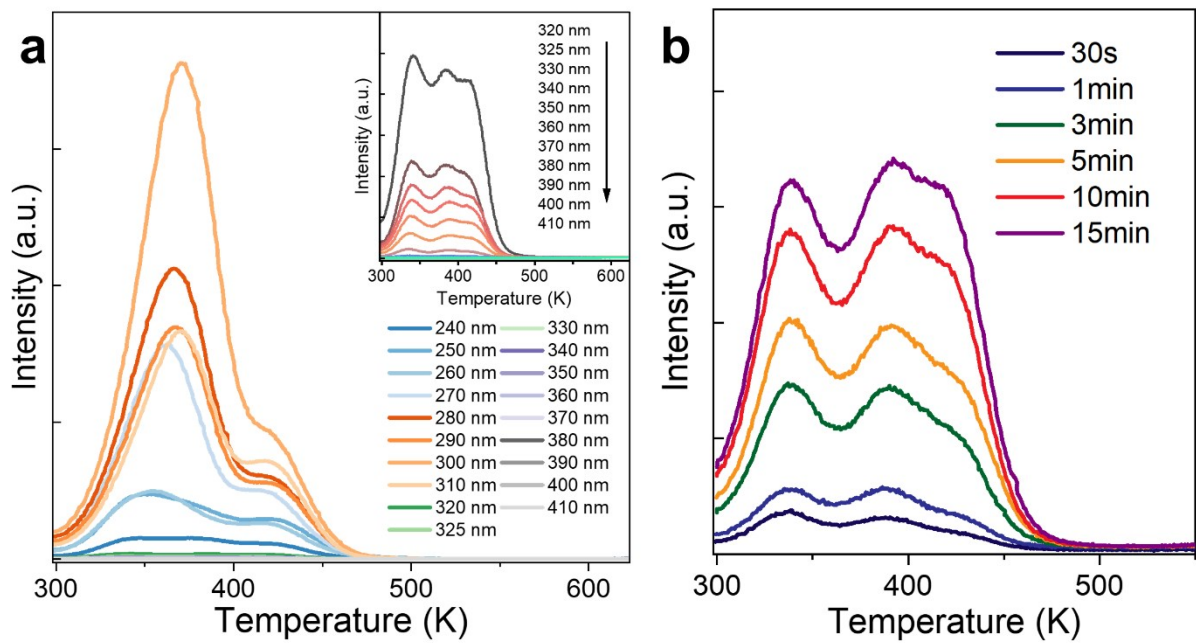

**Fig. S14.** (a) Thermoluminescence spectra of YGG:Bi after illumination by monochromatic light over the 240–410 nm spectral range for 5 min. (b) Thermoluminescence spectra obtained by illuminating the YGG:Bi sample using a 340 nm monochromatic light for different exposure times from 30 s to 15 min.

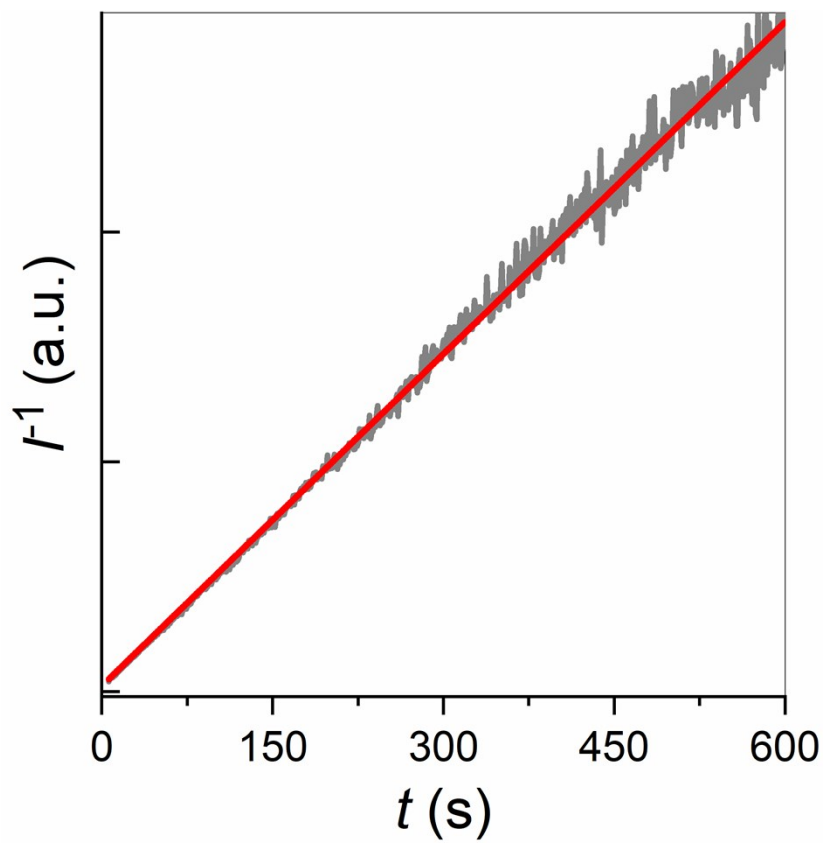

**Fig. S15.** The reciprocal of the persistent luminescence intensity ( $I^{-1}$ ) versus  $t$  after irradiation by 280 nm UV light for 15 min at 77 K.



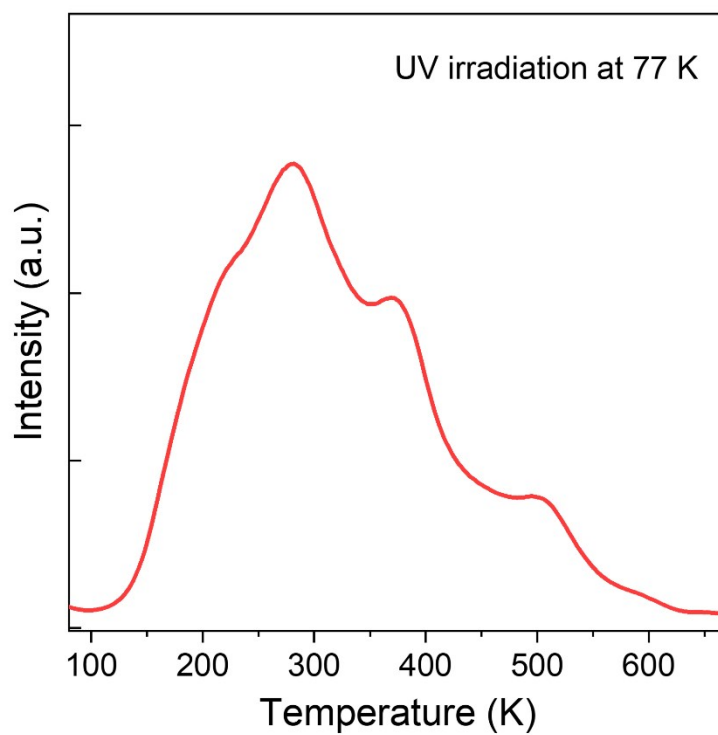

**Fig. S16.** Thermoluminescence curve recorded over 80–673 K on a YGG:Bi phosphor disc. The sample was pre-irradiated by 254 nm UV light for 30 s at 77 K.

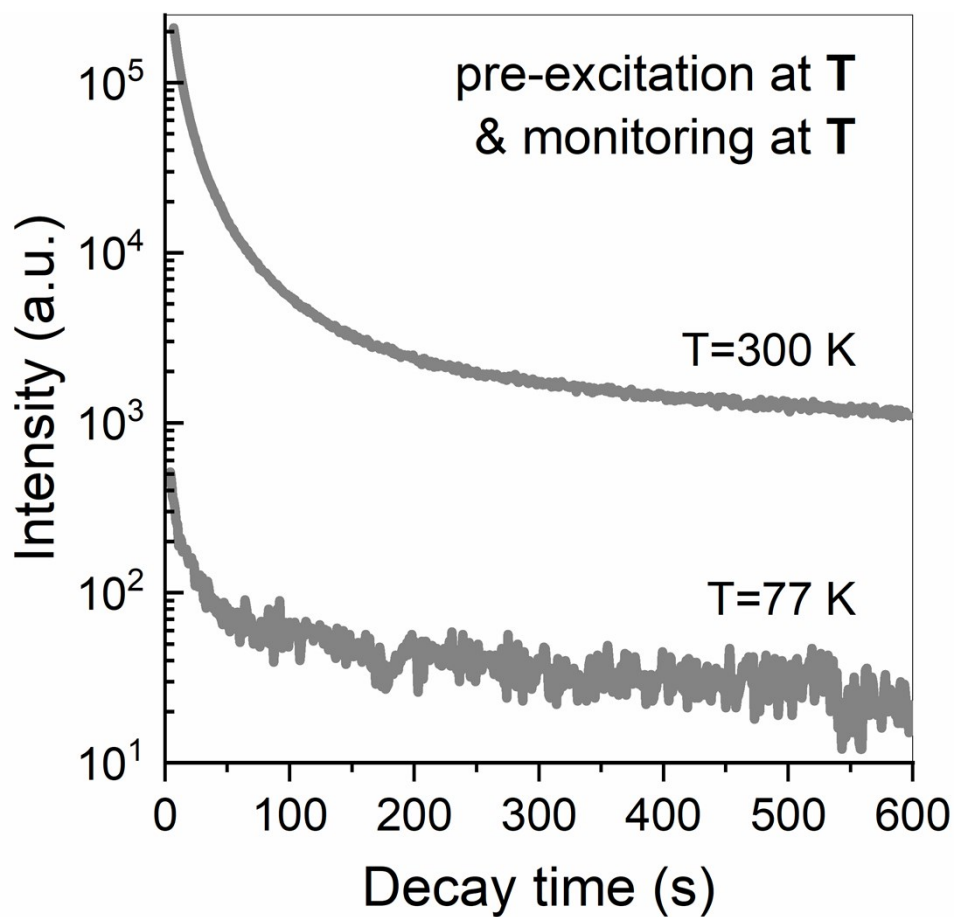

**Fig. S17.** Persistent luminescence decay curves after 340 nm excitation for 15 min at 77 K and 300 K.

**Table S1.** Rietveld refinement parameters of YGG:Bi phosphor. The standard data of cubic  $\text{Y}_3\text{Ga}_5\text{O}_{12}$  phase is given as reference.

| Sample                       | YGG:Bi             | YGG         |
|------------------------------|--------------------|-------------|
| Space group                  | Ia-3d              | Ia-3d       |
| a (Å)                        | 12.2805(7)         | 12.2730(10) |
| b (Å)                        | 12.2805(7)         | 12.2730(10) |
| c (Å)                        | 12.2805(7)         | 12.2730(10) |
| V                            | 1852.062(2)        | 1848.6(3)   |
| $\alpha=\beta=\gamma$ (°)    | 90                 | 90          |
| Density (g/cm <sup>3</sup> ) | 5.7906(8)          | 5.80        |
| Rp and Rwp                   | 8.803% and 10.805% |             |

**Table S2.** Intensities measured by a Newport UV photodetector (Source data are provided as a Source Data file).

| Decay time (s) | Intensity, $I_m$ (pW) |
|----------------|-----------------------|
| 10             | 298.7                 |
| 20             | 160.2                 |
| 30             | 108.4                 |
| 40             | 85.6                  |
| 50             | 70.4                  |
| 60             | 60.8                  |
| 70             | 52.9                  |
| 80             | 47.0                  |
| 90             | 42.3                  |
| 100            | 39.1                  |
| 110            | 37.0                  |
| 120            | 32.2                  |
| 130            | 33.3                  |
| 140            | 31.2                  |
| 150            | 30.1                  |

**Table S3.** Comparison of the reported UVB persistent phosphors

| Materials                                                                       | Excitation sources | Maximum emission | Duration | Sunlight excitable | Ref.      |
|---------------------------------------------------------------------------------|--------------------|------------------|----------|--------------------|-----------|
| $\text{Lu}_3\text{Al}_2\text{Ga}_3\text{O}_{12}:\text{Pr}^{3+}, \text{Gd}^{3+}$ | Blue LED           | 313 nm           | ~ 1h     | No                 | 1         |
| $\text{Sr}_3\text{Gd}_2\text{Si}_6\text{O}_{18}:\text{Pr}^{3+}$                 | UV lamp            | 311 nm           | >12h     | No                 | 2         |
| $\text{Y}_2\text{GdAl}_2\text{Ga}_3\text{O}_{12}:\text{Pr}^{3+}$                | UV lamp            | 311 nm           | >12h     | No                 | 2         |
| $\text{Sr}_3\text{Y}_2\text{Si}_6\text{O}_{18}:\text{Pb}^{2+}$                  | UV lamp            | 299 nm           | > 12h    | No                 | 2         |
| $\text{Sr}_3\text{Gd}_2\text{Si}_6\text{O}_{18}:\text{Pb}^{2+}$                 | UV lamp            | 311 nm           | > 12h    | No                 | 2         |
| $\text{Y}_3\text{Al}_2\text{Ga}_3\text{O}_{12}:\text{Bi}^{3+}$                  | UV lamp            | 307 nm           | ~ 6h     | No                 | 2         |
| $\text{Y}_2\text{GdAl}_2\text{Ga}_3\text{O}_{12}:\text{Bi}^{3+}$                | UV lamp            | 311 nm           | > 12h    | No                 | 2         |
| $\text{BaLu}_2\text{Al}_2\text{Ga}_2\text{SiO}_{12}:\text{Pr}^{3+}$             | UV lamp            | 301 nm           | > 3h     | No                 | 3         |
| $\text{Y}_3\text{Ga}_5\text{O}_{12}:\text{Bi}^{3+}$                             | UV lamp            | 313 nm           | > 60h    | Yes                | This work |

[1] S. Yan, F. Liu, J. Zhang, X. Wang, Y. Liu, *Phys. Rev. Applied*, 2020, **13**, 044051.

[2] X. Wang, Y. Chen, P. A. Kner, Z. Pan, *Dalton Trans.*, 2021, **50**, 3499.

[3] W. Yuan, T. Tan, H. Wu, R. Pang, S. Zhang, L. Jiang, D. Li, Z. Wu, C. Li, H. Zhang, *J. Mater. Chem. C*, 2021, **9**, 5206.
